# Supplementary material
Source: PubMed Central journal article supplement (PMC3807277)
Supplement: JVI.01633-13_zjv999098142so1.pdf [file JVI.01633-13_zjv999098142so1.pdf]

1 **Supplemental Data**

2

3 **Dystonin/BPAG1 promotes plus-end directed transport of Herpes Simplex Virus 1**

4 **capsids on microtubules during entry**

5 Marion McElwee, Frauke Beilstein, Marc Labetoulle, Frazer J. Rixon and David Padeloup,

6

7 **Supplemental Legends**

8 **Supplemental Movie S1.** Capsid trafficking of vSR27-VP26GFP in shControl HFFF2 cells.

9 HFFF2 shControl cells were infected with 50 pfu/cell of vSR27-VP26GFP at 37°C. Starting  
10 45 minutes after infection, capsid trafficking was monitored at room temperature at 1  
11 frame/second for 60 seconds. The movie is shown at 10 frames/second. Frame is 48 µm by 55  
12 µm.

13

14 **Supplemental Movie S2.** Capsid trafficking of vSR27-VP26GFP in shDyst HFFF2 cells.

15 HFFF2 shDyst cells were infected with 50 pfu/cell of vSR27-VP26GFP at 37°C. Starting 45  
16 minutes after infection, capsid trafficking was monitored at room temperature at 1  
17 frame/second for 60 seconds. The movie is shown at 10 frames/second. Frame is 54 µm by 34  
18 µm.

19

20 **Supplemental Movie S3.** Capsid trafficking of vSR27-VP26GFP at the vicinity of the

21 centrosome of shControl HFFF2 cells. HFFF2 shControl cells were infected with 50 pfu/cell  
22 of vSR27-VP26GFP at 37°C. Starting 45 minutes after infection, capsid trafficking at the  
23 vicinity of the centrosome was monitored at room temperature at 1 frame/second for 60  
24 seconds. The movie is shown at 10 frames/second. Frame is 82 µm by 68 µm.

25

26 **Supplemental Movie S4.** Capsid trafficking of vSR27-VP26GFP at the vicinity of the  
27 centrosome of shDyst HFFF2 cells. HFFF2 shDyst cells were infected with 50 pfu/cell of  
28 vSR27-VP26GFP at 37°C. Starting 45 minutes after infection, capsid trafficking at the  
29 vicinity of the centrosome was monitored at room temperature at 1 frame/second for 60  
30 seconds. The movie is shown at 10 frames/second. Frame is 47  $\mu\text{m}$  by 39  $\mu\text{m}$ .

31

32
